# Supplementary material for: Faecal Microbiota Dynamics and their Relation to Disease Course in Crohn’s Disease
Source: PubMed Central journal article supplement — J Crohns Colitis. 2019 Feb 27;13(10):1273–82. doi: 10.1093/ecco-jcc/jjz049 (PMC6764104; doi:10.1093/ecco-jcc/jjz049), 2019-02-27
Supplement: jiz049_suppl_supplementary_material.pdf [file jiz049_suppl_supplementary_material.pdf]

## SUPPLEMENTARY INFORMATION

### Supplementary methods

#### DNA isolation and sequencing

DNA isolation of fecal samples was performed in batches of 11 or 23 by repeated bead beating in combination with the PSP spin stool kit (Stratec Molecular, Berlin, Germany) as described previously (1). For each DNA isolation batch, one additional isolation was performed on PCR-grade water as a negative control.

Amplicon library preparation and sequencing was performed according to a previous published protocol (2). The 515f/806r primer pair was used to amplify the V4 region of the 16S rRNA gene. PCR reactions were performed using 25  $\mu$ L NEB Phusion High-Fidelity Master Mix (New England Biolabs, Ipswich, USA), 4  $\mu$ L 515f/806r primer mix and 30 ng metagenomics DNA under the following conditions: denaturation at 98°C for 3 minutes, followed by 30 cycles of denaturation at 98°C for 45 seconds, annealing at 55°C for 45 seconds and extension at 72°C for 45 seconds. The final elongation step was at 72°C for 7 minutes. Amplicons were purified using the AMPure XP purification (Agencourt, Massachusetts, USA) according to the manufacturer's instructions. Amplicons were mixed in equimolar concentrations and sequenced on an Illumina MiSeq instrument.

#### Sequence Analysis

Quality control of the sequencing data were performed using FastQC software (<http://www.bioinformatics.babraham.ac.uk/projects/fastqc>) using default settings. Data demultiplexing, length and quality filtering and clustering of reads into Operational Taxonomic Units (OTUs) at 97% sequence identity was done using the online Integrated Microbial Next Generation Sequencing (IMNGS) platform (3) using default settings except for minimum and maximum length for amplicons, which were set at 100 and 500 bp respectively.

After quality filtering and binning and removing unassigned reads, a total of 2,829,437 sequences with an average of 19,649 paired sequences per sample (range: 11,744-26,641 sequences/sample) remained for downstream analysis and were clustered in 473 OTUs.

Data normalization, alpha indices, taxonomical binning and unsupervised clustering were performed using *Rhea* (4).

In order not to discard informative data, normalization in *Rhea* is performed by dividing OTU counts per sample for their total count (sample depth) and then multiplying the obtained relative abundance for the lowest sample depth (11744 reads/sample).

## References

1. Tedjo DI, Jonkers DMAE, Savelkoul PH, et al. The Effect of Sampling and Storage on the Fecal Microbiota Composition in Healthy and Diseased Subjects. PLOS ONE 2015;10:e0126685.
2. Caporaso JG, Lauber CL, Walters WA, et al. Ultra-high-throughput microbial community analysis on the Illumina HiSeq and MiSeq platforms. The ISME Journal 2012;6:1621-1624.
3. Lagkouravdos I, Joseph D, Kapfhammer M, et al. IMNGS: A comprehensive open resource of processed 16S rRNA microbial profiles for ecology and diversity studies. Sci Rep 2016;6:33721.
4. Lagkouravdos I, Fischer S, Kumar N, et al. Rhea: a transparent and modular R pipeline for microbial profiling based on 16S rRNA gene amplicons. PeerJ 2017;5:e2836.

## SUPPLEMENTARY TABLES

**Supplementary Table 1** CD patients characteristics

|                                               | <b>Remission-remission<br/>(n=35)</b> | <b>Remission-active<br/>(n=22)</b> | <b>Healthy<br/>controls<br/>(n=15)</b> |
|-----------------------------------------------|---------------------------------------|------------------------------------|----------------------------------------|
| <b>Age at inclusion (median, IQR)</b>         | 43 (33-53)                            | 38 (26-59)                         | 25 (23-30)                             |
| <b>Male (%)</b>                               | 10 (28.6)                             | 10 (45.5)                          | 8 (53.3)                               |
| <b>Smoking (%)</b>                            | 8 (22.9)                              | 2 (9.1)                            | 0 (0)                                  |
| <b>Age at diagnosis<sup>1</sup> (%)</b>       |                                       |                                    |                                        |
| <b>A1 (&lt;16 year)</b>                       | 1 (2.9)                               | 1 (4.5)                            | Na                                     |
| <b>A2 (17-40 year)</b>                        | 30 (85.7)                             | 13 (59.1)                          |                                        |
| <b>A3 (&gt;40 year)</b>                       | 4 (11.4)                              | 8 (36.4)                           |                                        |
| <b>Disease localization<sup>1</sup> (%)</b>   |                                       |                                    |                                        |
| <b>L1 (ileal)</b>                             | 12 (34.3)                             | 7 (31.8)                           | Na                                     |
| <b>L2 (colonic)</b>                           | 8 (22.9)                              | 7 (31.8)                           |                                        |
| <b>L3 (ileocolonic)</b>                       | 15 (42.9)                             | 8 (36.4)                           |                                        |
| <b>Phenotype at inclusion<sup>1</sup> (%)</b> |                                       |                                    |                                        |
| <b>B1 (nonstricturing, non penetrating)</b>   | 26 (74.3)                             | 12 (54.5)                          | Na                                     |
| <b>B2 (stricturing)</b>                       | 6 (17.1)                              | 5 (22.7)                           |                                        |

|                                      |          |          |       |
|--------------------------------------|----------|----------|-------|
| <b>B3 (penetrating)</b>              | 3 (8.6)  | 5 (22.7) |       |
| <b>Abdominal Surgery<sup>2</sup></b> | 8 (22.9) | 4 (18.2) | 0 (0) |

<sup>1</sup> According to Montreal Classification

<sup>2</sup> includes (hemi)colectomy and ileocecal resection

**Supplementary Table 2** Medication use and time between sampling moments for active and remission samples

|                                                              | RR                  |                         | RA                  |                        |
|--------------------------------------------------------------|---------------------|-------------------------|---------------------|------------------------|
|                                                              | Remission<br>(n=35) | Remission<br>(n=35)     | Remission<br>(n=22) | Active (n=22)          |
| <b>Medication (%)<sup>‡</sup></b>                            |                     |                         |                     |                        |
| <b>Mesalazine</b>                                            | 5 (14.3)            | 5 (14.3)                | 4 (18.2)            | 5 (22.7)               |
| <b>Thiopurines</b>                                           | 11 (31.4)           | 11 (31.4)               | 9 (40.9)            | 7 (31.8)               |
| <b>Biologicals</b>                                           | 18 (51.4)           | 19 (54.3)               | 13 (59.1)           | 15 (68.2)              |
| <b>Corticosteroids</b>                                       | 1 (2.9)             | 0 (0)                   | 1 (4.5)             | 1 (4.5)                |
| <b>Proton Pump Inhibitors</b>                                | 7 (20)              | 7 (20)                  | 8 (36.4)            | 8 (36.4)               |
| <b>Antibiotics<sup>#</sup></b>                               | 1 (2.9)             | 0 (0)                   | 1 (4.5)             | 0 (0)                  |
| <b>Time between sampling moments<br/>(week, median, IQR)</b> |                     | 14 (11-21) <sup>1</sup> |                     | 20 (8-36) <sup>2</sup> |

<sup>‡</sup>Six RR and five RA patients had a medication change between consecutive samples during the study period. In the RR group, mesalazine was stopped by 1 patients, prednisone by 1 patient, and biologicals in 2 patients, while 1 patient started mesalazine and 1 patient with started biologicals. In the RA group, 2 patients started with biologicals, 2 patients stopped with thiopurines and 1 patient started with mesalazine.

<sup>1</sup> Time between first remission and second remission samples

<sup>2</sup> Time between first remission and first active samples

<sup>#</sup> Ciprofloxacin and cotrimoxazol were used two and one month prior to sample collection, respectively.

**Supplementary Table 3** z statistics and p-value resulting from Generalized Linear Model on clinical history 1 year before the study period and enterotype clusters

|                    | Estimate | Std. Error | z value  | Pr(> z ) |
|--------------------|----------|------------|----------|----------|
| <b>(Intercept)</b> | -0.53063 | 0.398527   | -1.33147 | 0.183033 |
| <b>E2</b>          | 0.443617 | 0.577119   | 0.768675 | 0.442086 |
| <b>E3</b>          | 0.81831  | 0.861485   | 0.949883 | 0.342172 |

**Supplementary Table 4** z statistics and p-value resulting from Generalized Linear Model on clinical course during the 5 years following the study period and enterotype clusters

|                    | Estimate | Std. Error | z value  | Pr(> z ) |
|--------------------|----------|------------|----------|----------|
| <b>(Intercept)</b> | 0.223144 | 0.387298   | 0.576154 | 0.564511 |
| <b>E2</b>          | 0.405465 | 0.584523   | 0.693669 | 0.48789  |
| <b>E3</b>          | 0.064539 | 0.856349   | 0.075365 | 0.939925 |

**Supplementary Table 5** F statistics and p-value resulting from PERMANOVA on microbiota composition using the clinical history 1 year before the study period as explanatory variable

|                      | Df | SumOfSqs    | R2       | F        | Pr(>F) |
|----------------------|----|-------------|----------|----------|--------|
| <b>1 year before</b> | 2  | 0.393114439 | 0.036689 | 1.028328 | 0.399  |
| <b>Residual</b>      | 54 | 10.32169678 | 0.963311 | NA       | NA     |
| <b>Total</b>         | 56 | 10.71481121 | 1        | NA       | NA     |

**Supplementary Table 6** F statistics and p-value resulting from PERMANOVA on microbiota composition using the clinical course during the 5 year following the study period as explanatory variable

|                      | Df | SumOfSqs | R2       | F        | Pr(>F) |
|----------------------|----|----------|----------|----------|--------|
| <b>rec.5.Y.after</b> | 2  | 0.361603 | 0.033748 | 0.943019 | 0.5063 |
| <b>Residual</b>      | 54 | 10.35321 | 0.966252 | NA       | NA     |
| <b>Total</b>         | 56 | 10.71481 | 1        | NA       | NA     |

**Supplementary Table 7** F statistics and p-value resulting from PERMANOVA on microbiota composition using the Montreal classification factors, medication usage, smoking, surgery, and sample depth.

|                                    | <b>F</b> | <b>Pr(&gt;F)</b> |
|------------------------------------|----------|------------------|
| <b>Disease localization</b>        | 0.82734  | 0.655            |
| <b>Age at diagnosis</b>            | 0.843010 | 0.558            |
| <b>Phenotype</b>                   | 2.084877 | 0.016            |
| <b>Thiopurines</b>                 | 0.408099 | 0.971            |
| <b>Mesalazines</b>                 | 0.655223 | 0.773            |
| <b>Biological</b>                  | 0.581659 | 0.828            |
| <b>Corticosteroids</b>             | 1.044867 | 0.293            |
| <b>Proton Pump Inhibitors</b>      | 0.781195 | 0.61             |
| <b>Surgery</b>                     | 1.554117 | 0.123            |
| <b>Smoking</b>                     | 0.879233 | 0.591            |
| <b>Number of liquid stools/day</b> | 1.1946   | 0.247            |
| <b>Sequencing depth</b>            | 1.709101 | 0.089            |

**Supplementary Table 8** F statistics and p-value resulting from PERMANOVA on microbiota composition using the disease phenotype: B1(non stricturing, non penetrating); B2(structuring); B3(penetrating).

|                  | <b>F</b> | <b>Pr(&gt;F)</b> |
|------------------|----------|------------------|
| <b>B1 vs. B2</b> | 0.703237 | 0.691            |
| <b>B1 vs. B3</b> | 2.839477 | 0.013            |
| <b>B2 vs. B3</b> | 2.082749 | 0.039            |

## SUPPLEMENTARY FIGURES

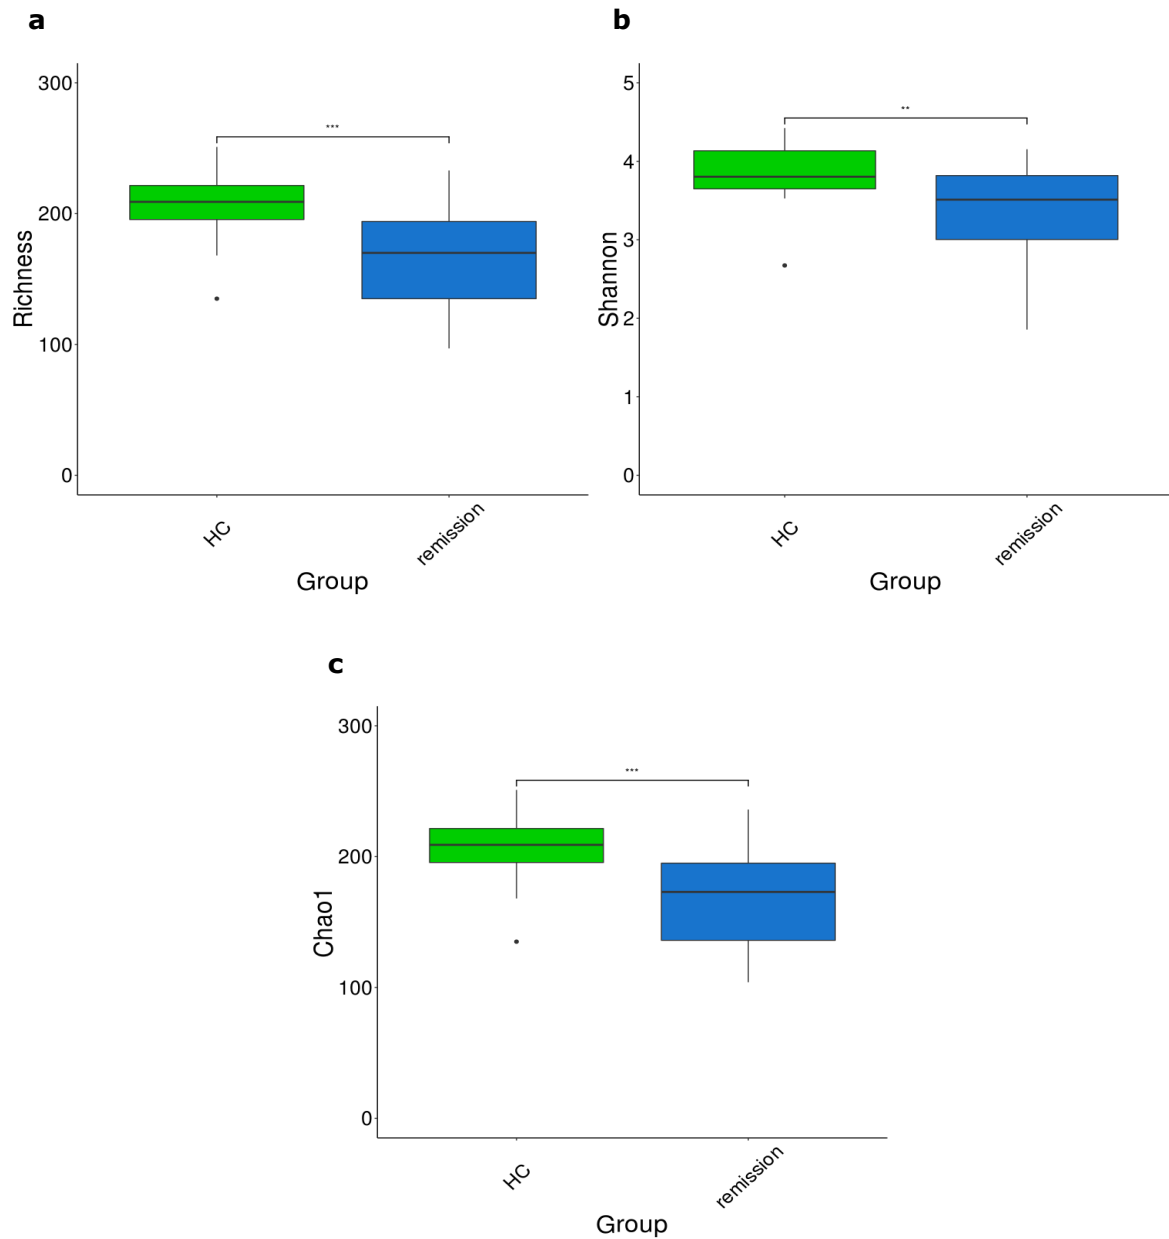

**Supplementary Figure 1** Baseline alpha diversity indices: a) Observed species (richness), b) Chao1, and c) Shannon index within healthy controls (HC) and Crohn's disease patients at baseline. All patients were in remission state at baseline. Significance was tested using Wilcoxon Signed-Ranks Test; \*\*\* indicates  $p < 0.01$ .

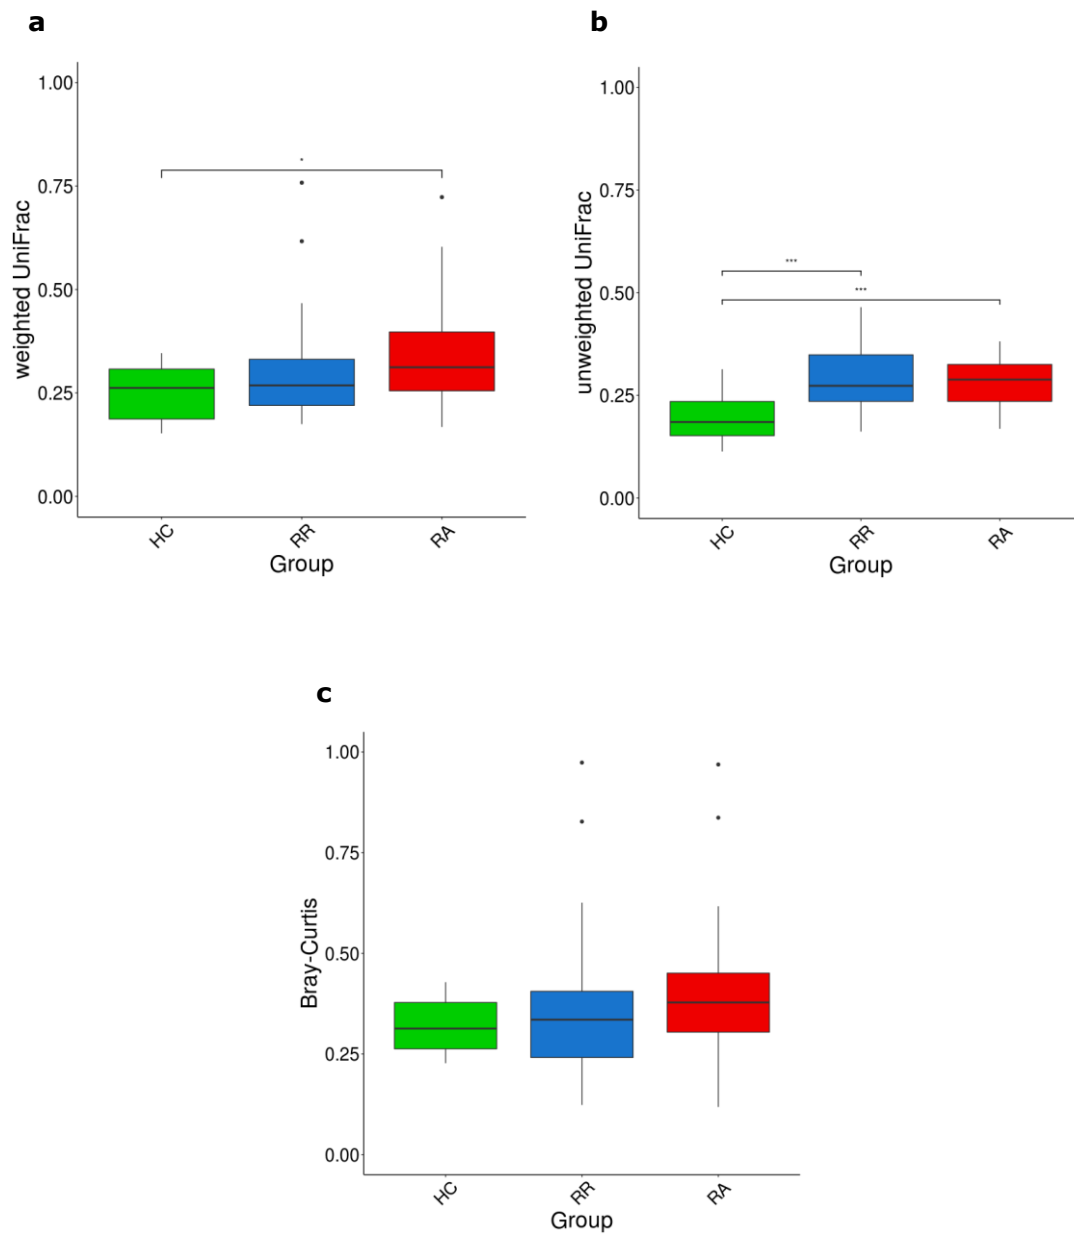

**Supplementary Figure 2** Within-subject beta-diversity between two subsequent sampling time-points (T1-T2): a) Weighted UniFrac, b) Unweighted UniFrac and c) Bray-Curtis distance, in healthy individuals (HC), CD patients maintaining in remission (RR) and CD patients in remission and subsequent exacerbation (RA).



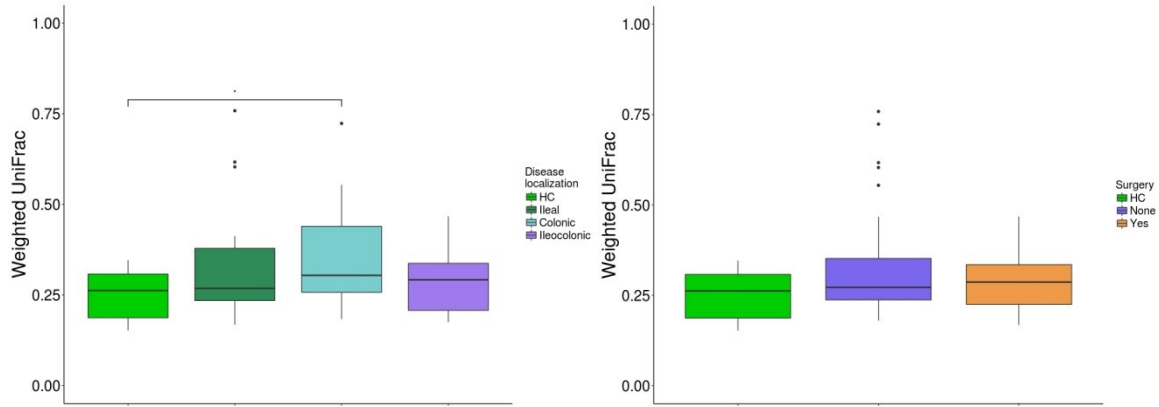

**Supplementary Figure 3** Within-subject weighted UniFrac distance between two subsequent sampling time-points (T1-T2) among: a) CD patients with different disease localization and healthy subjects, and b) CD patients that did or did not received abdominal surgery .

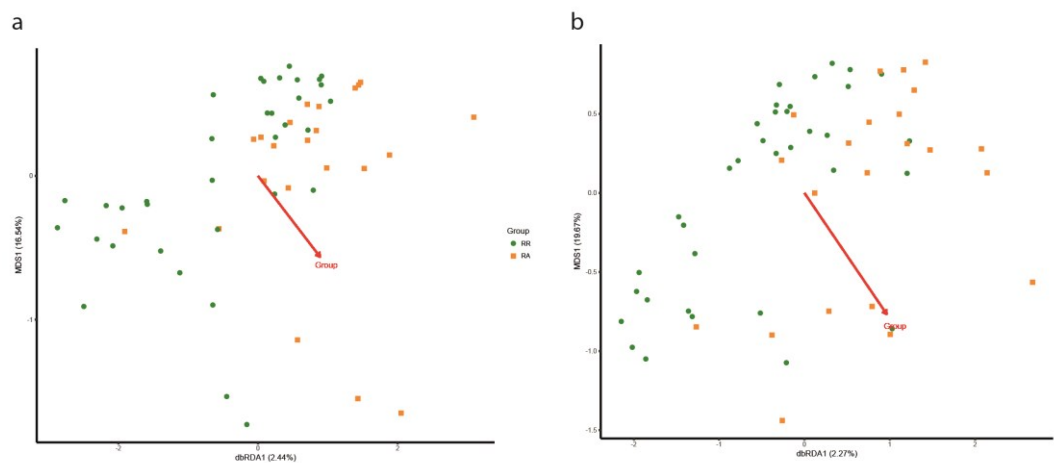

**Supplementary Figure 4** Distance-based redundancy analysis (dbRDA) based on weighted UniFrac distances using patient group as explanatory variable at **a)** baseline (T1) and **b)** at second time point (T2). Significance was tested using PERMANOVA resulting in  $p=0.12$  and  $p=0.15$  for T1 and T2 respectively.

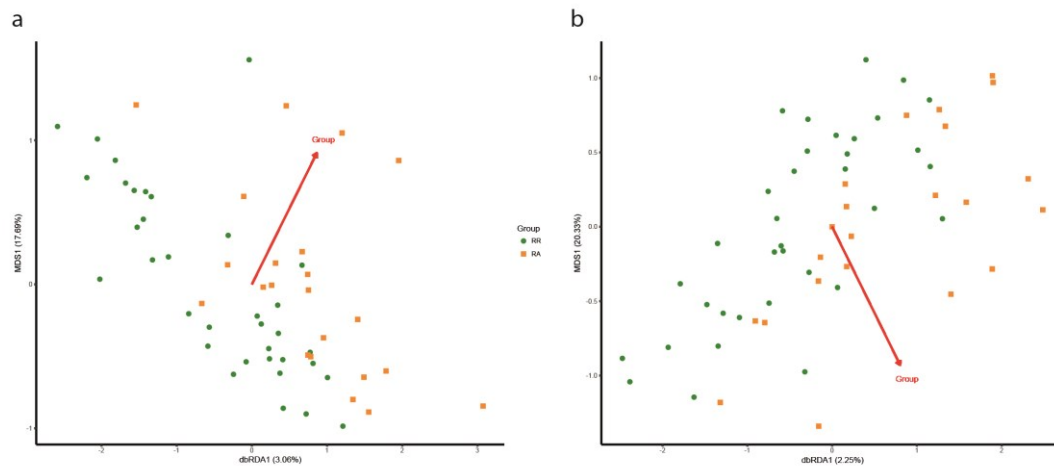

**Supplementary Figure 5** Distance-based redundancy analysis (dbRDA) based on weighted UniFrac distances using patient group as explanatory variable and partially filtering out *Bacteroides:Prevotella* ratio, age, gender, and medications use at **a)** baseline (T1) and **b)** at second time point (T2). Significance was tested using PERMANOVA resulting in  $p=0.12$  and  $p=0.17$  for T1 and T2 respectively.
